# Supplementary material for: The Relationship of the Post-reflux Swallow-induced Peristaltic Wave Index and Esophageal Baseline Impedance with Gastroesophageal Reflux Disease Symptoms
Source: PubMed Central journal article supplement — J Neurogastroenterol Motil. 2017 Apr 1;23(2):237–44. doi: 10.5056/jnm16115 (PMC5383118; doi:10.5056/jnm16115), 2017-04-01
Supplement: jnm-23-237_suppl.1.pdf [file jnm-23-237_suppl.1.pdf]

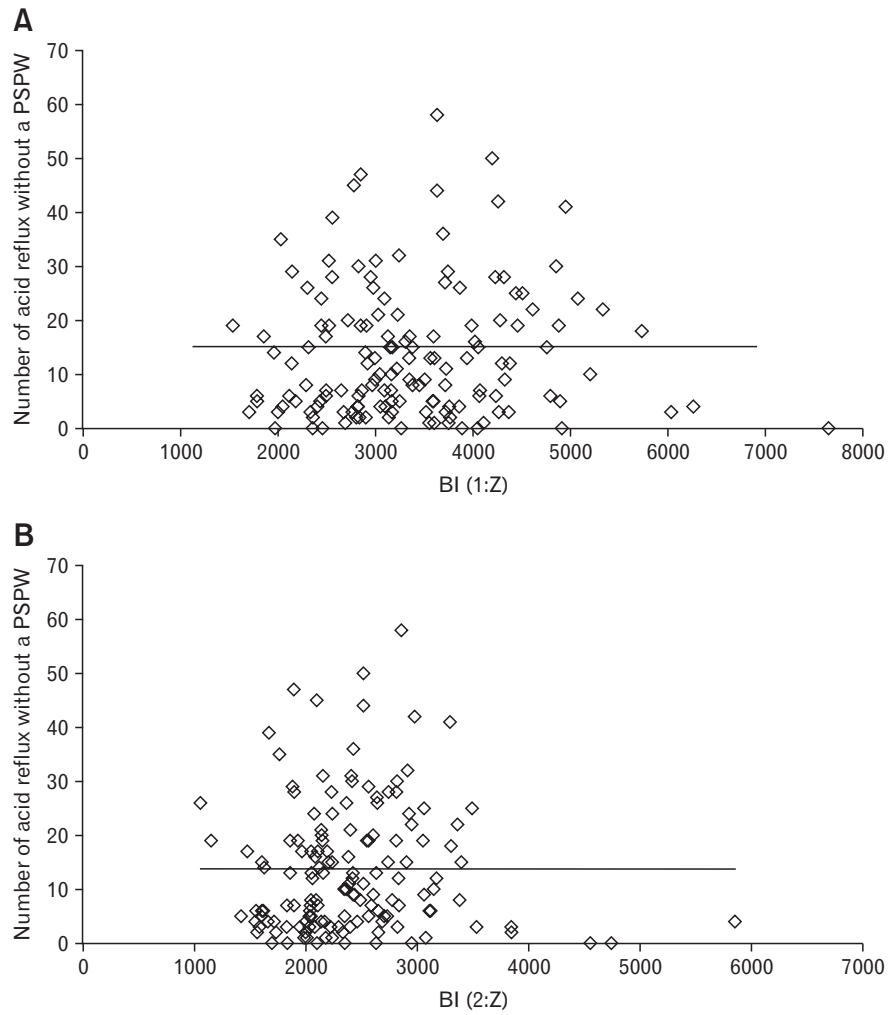

**Supplementary Figure 1.** Relationships between esophageal baseline impedance (BI) and number of acid reflux without a post-reflux swallow-induced peristaltic wave (PSPW). (A) Esophageal BI (ohm) at 3 cm above the lower esophageal sphincter (LES) was significantly but weakly correlated with acid reflux without a PSPW ( $r = -0.267$ ,  $P = 0.001$ ). (B) Esophageal BI (ohm) at 5 cm above the LES was significantly but weakly correlated with acid reflux without a post-reflux swallow-induced peristaltic wave ( $r = -0.283$ ,  $P = 0.001$ ).
