# Supplementary material for: The Relationship of the Post-reflux Swallow-induced Peristaltic Wave Index and Esophageal Baseline Impedance with Gastroesophageal Reflux Disease Symptoms
Source: PubMed Central journal article supplement — J Neurogastroenterol Motil. 2017 Apr 1;23(2):237–44. doi: 10.5056/jnm16115 (PMC5383118; doi:10.5056/jnm16115), 2017-04-01
Supplement: jnm-23-237_suppl.2.pdf [file jnm-23-237_suppl.2.pdf]

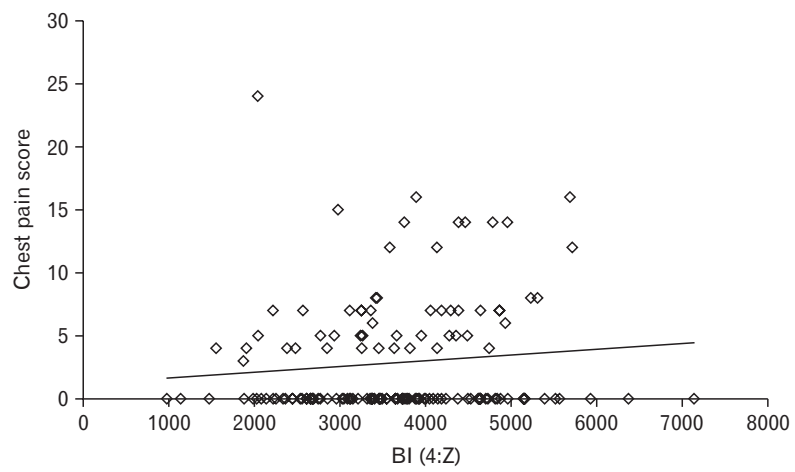

**Supplementary Figure 2.** Relationships between esophageal baseline impedance (BI) at 9 cm from the lower esophageal sphincter (LES) and chest pain. Chest pain was positively and weakly correlated with esophageal BI (ohm) at a level of 9 cm above the LES ( $P < 0.05$ ).
